# Supplementary material
Source: PubMed Central journal article supplement (PMC518833)
Supplement: pnas_101_38_13780__1.pdf [file pnas_101_38_13780__1.pdf]

**Table 2. Data collection and refinement statistics**

| Data collection                                                           |              |              |               |                |
|---------------------------------------------------------------------------|--------------|--------------|---------------|----------------|
| Dataset                                                                   | FEHR         | FE0          | FE30          | FE120          |
| X-ray source                                                              | ID29         | ID29         | PX06          | ID29           |
| X-ray wavelength, Å                                                       | 0.976        | 1.731        | 1.731         | 1.731          |
| Space group                                                               | P321         | P321         | P321          | P321           |
| Cell dimensions ( <i>a</i> , <i>b</i> , <i>c</i> ), Å                     | 91.11        | 90.95        | 92.17         | 90.56          |
|                                                                           | 91.11        | 90.95        | 92.17         | 90.56          |
|                                                                           | 150.04       | 149.39       | 152.10        | 148.57         |
| Resolution, Å                                                             | 1.6          | 2.2          | 2.9           | 2.2            |
| Observations                                                              | 397,354      | 226,621      | 116,390       | 386,210        |
| Unique reflections                                                        | 92,251       | 36,571       | 30,227        | 345,72         |
| Mosaicity, °                                                              | 0.23         | 0.23         | 0.23          | 0.28           |
| Wilson <i>B</i> -factor, Å <sup>2</sup>                                   | 28.6         | 37.7         | 61.5          | 18.9           |
| <i>I</i> / $\sigma$ ( <i>I</i> )*, <i>R</i> <sub>merge</sub> <sup>†</sup> | 10.07, 0.074 | 11.11, 0.109 | 9.75, 0.093   | 8.99, 0.079    |
| Completeness, %                                                           | 96.5         | 98.7         | 94.2          | 97.6           |
| Refinement statistics (CNS/REFMAC)                                        |              |              |               |                |
| Space group                                                               | P321         | P321         | P321          | P321           |
| Resolution, Å                                                             | 30-1.6       | 30-2.2       | 20-2.9        | 15-2.2         |
| Reflections ( <i>F</i> >0)                                                | 56,417       | 34,298       | 17,102        | 34,572         |
| <i>R</i> factor, <i>R</i> <sub>free</sub> <sup>‡</sup>                    | 0.16, 0.21   | 0.17/0.23    | 0.21/0.23     | 0.18/0.23      |
| Mean <i>B</i> value, Å <sup>2</sup>                                       | 21.5         | 31.2         | 58.0          | 46.4           |
| rms deviation bonds, Å; angles, °                                         | 0.017, 1.55  | 0.023, 1.56  | 0.030, 1.67   | 0.033, 2.2     |
| Total no. of atoms                                                        | 6,766        | 5,741        | 5,550         | 5,735          |
| No. of protein residues                                                   | 705          | 705          | 705           | 705            |
| No. of waters                                                             | 796          | 270          | 40            | 312            |
| No. of ions (Fe/Mg/Na)                                                    | 6/4/2        | 6/4/2        | 38/0/2        | 30/0/2         |
| Iron content <sup>§</sup>                                                 | Low (0 min)  | Low (0 min)  | High (30 min) | High (120 min) |
| No. of irons in TS <sup>¶</sup>                                           | 0            | 0            | 3 (T1-T3)     | 3 (T1-T3)      |
| No. of irons is FOC <sup>¶</sup>                                          | 1 (F1)       | 1 (F1)       | 3 (F1-F3)     | 1 (F1)         |
| No. of irons in NI <sup>¶</sup>                                           | 0            | 0            | 3 (N11-N13)   | 3 (N11-N13)    |
| No. of irons in NII <sup>¶</sup>                                          | 1 (N21)      | 1 (N21)      | 5 (N21-N25)   | 5 (N21-N25)    |

FEHR, low-iron high-resolution dataset.

\*As calculated with the XSCALE (1).

<sup>†</sup> $R_{\text{merge}} = \frac{\sum_{\text{hkl}} \sum_i |I_i(\text{hkl}) - \langle I(\text{hkl}) \rangle|}{\sum_{\text{hkl}} \sum_i I_i(\text{hkl})}$ ; values in parentheses correspond to the highest-resolution shell.

<sup>‡</sup> $R$  factor =  $\frac{\sum |F_{\text{obs}} - F_{\text{calc}}|}{\sum F_{\text{obs}}}$ ; *R*<sub>free</sub> calculated with 7% of the data.

<sup>§</sup>Incubation time of crystals with Fe<sup>2+</sup> solutions is given in parentheses.

<sup>¶</sup>Definition of the subsites used in the text is given in parentheses.

1. Kabsch, W. J. (1988) *Appl. Crystallogr.* **21**, 67-71.
